# Supplementary material for: High Levels of TRIM5α Are Associated with Xenophagy in HIV-1-Infected Long-Term Nonprogressors
Source: MDPI journal article supplement (doi:10.3390/cells10051207), 2021-05-14
Supplement: s1 [file s1]

**Supplementary Table 1**  
**Demographics, viral load and CD4 T cell number of LTNP patients.**

| Patient Number | Gender (M/F) | Age (yrs) | Plasma HIV-1 RNA ( $\log_{10}$ cp/ml) | CD4 T cells (number/ $\mu$ l) |
|----------------|--------------|-----------|---------------------------------------|-------------------------------|
| 1              | F            | 51        | 2,94                                  | 1202                          |
| 2              | M            | 35        | 3,21                                  | 1049                          |
| 3              | F            | 43        | 2,50                                  | 656                           |
| 4              | F            | 49        | 1,6                                   | 1213                          |
| 5              | M            | 28        | 3,17                                  | 788                           |
| 6              | M            | 52        | 1,6                                   | 794                           |
| 7              | M            | 37        | 3,44                                  | 754                           |
| 8              | M            | 31        | 2,30                                  | 839                           |
| 9              | F            | 57        | 1,6                                   | 1163                          |
| 10             | F            | 48        | 2,31                                  | 1100                          |

**Supplementary Table 2**  
**Demographics, viral load and CD4 T cell number of NP patients.**

| Patient Number | Gender (M/F) | Age (yrs) | Plasma HIV-1 RNA ( $\log_{10}$ cp/ml) | CD4 T cells (number/ $\mu$ l) |
|----------------|--------------|-----------|---------------------------------------|-------------------------------|
| 1              | M            | 41        | 3,99                                  | 340                           |
| 2              | M            | 29        | 1,89                                  | 458                           |
| 3              | M            | 23        | 5,99                                  | 471                           |
| 4              | M            | 51        | 5,1                                   | 7                             |
| 5              | M            | 46        | 3,82                                  | 442                           |
| 6              | M            | 47        | 3,8                                   | 204                           |
| 7              | M            | 21        | 5,42                                  | 494                           |
| 8              | M            | 50        | 4,88                                  | 315                           |
| 9              | M            | 25        | 1,99                                  | 469                           |
| 10             | F            | 67        | 2                                     | 435                           |
| 11             | M            | 37        | 1,9                                   | 468                           |
| 12             | M            | 38        | 5,85                                  | 120                           |
| 13             | F            | 38        | 3,8                                   | 362                           |
| 14             | M            | 47        | 4,58                                  | 89                            |
| 15             | M            | 24        | 3,99                                  | 376                           |

## Supplementary Figure 1

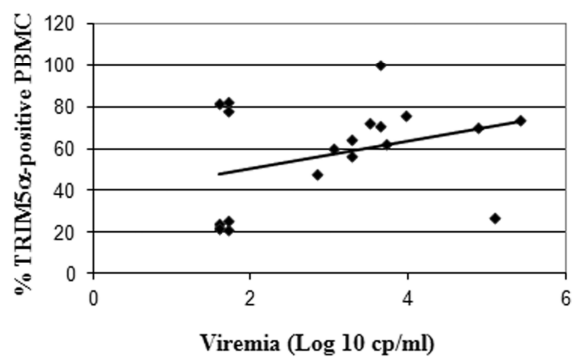

**Figure S1.** Correlation between TRIM5 $\alpha$  and plasma viremia (Log10cp/ml) in PBMC from HIV-1-infected patients. The data revealed that there is no a linear correlation between these parameters.

## Supplementary Figure 2

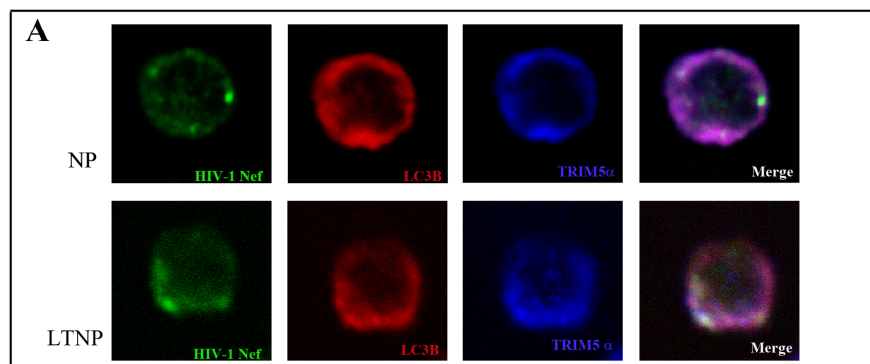

**Figure S2.** Colocalization of HIV-1 protein Nef and TRIM5α in autophagic vacuoles in PBMC from LTNP.

(A) Confocal microscopy immunolocalization of the HIV-1 protein Nef (green), LC3B (red) and TRIM5α (blue) on PBMC from NP and LTNP.
